# Supplementary material for: Efficient Convolution Network to Assist Breast Cancer Diagnosis and Target Therapy
Source: MDPI journal article supplement (doi:10.3390/cancers15153991), 2023-08-06
Supplement: s1 [file s1]

# Supplementary Materials: Efficient Convolution Network to Assist Breast Cancer Diagnosis and Target Therapy

Ching-Wei Wang <sup>1,\*</sup> , Kai-Lin Chu <sup>1</sup>, Hikam Muzakky <sup>1</sup>, Yi-Jia Lin <sup>2,3</sup>  and Tai-Kuang Chao <sup>2,3,\*</sup> 

**Table S1.** Multiple comparisons for segmentation of breast cancer metastases on WSI dataset : LSD test.

| LSD Multiple Comparision |                  |                                     |                       |            |        |          |       |
|--------------------------|------------------|-------------------------------------|-----------------------|------------|--------|----------|-------|
| Measurement              | (I) Method       | (J) Method                          | Mean Difference (I-J) | Std. Error | Sig.   | 95% C.I. |       |
| Precision                | Proposed D-FCN2s | Proposed DSL-FCN2s                  | 5.19                  | 8.34       | 0.535  | -11.33   | 21.71 |
|                          |                  | Proposed SL-FCN [1]                 | -1.27                 | 8.49       | 0.881  | -18.1    | 15.56 |
|                          |                  | Modified FCN [2-6]                  | -1.61                 | 8.49       | 0.85   | -18.44   | 15.23 |
|                          |                  | U-Net [7]                           | ***38.98              | 8.49       | <0.001 | 22.14    | 55.81 |
|                          |                  | SegNet [8]                          | ***32.81              | 8.49       | <0.001 | 15.97    | 49.64 |
|                          |                  | FCN [9]                             | ***32.39              | 8.49       | <0.001 | 15.56    | 49.23 |
|                          |                  | Deeplabv3+ [10] with MobileNet [11] | **23.23               | 8.49       | 0.007  | 6.39     | 40.06 |
|                          |                  | Deeplabv3+ [10] with Xception [12]  | **26.23               | 8.49       | 0.003  | 9.39     | 43.06 |
| Recall                   | Proposed D-FCN2s | Deeplabv3+ [10] with ResNet [13]    | 12.23                 | 8.49       | 0.153  | -4.61    | 29.06 |
|                          |                  | Proposed DSL-FCN2s                  | 1.75                  | 7.48       | 0.815  | -13.07   | 16.57 |
|                          |                  | Proposed SL-FCN [1]                 | 3.47                  | 7.62       | 0.65   | -11.63   | 18.58 |
|                          |                  | Modified FCN [2-6]                  | 5.28                  | 7.62       | 0.49   | -9.82    | 20.39 |
|                          |                  | U-Net [7]                           | **24.7                | 7.62       | 0.002  | 9.59     | 39.8  |
|                          |                  | SegNet [8]                          | ***30.11              | 7.62       | <0.001 | 15.01    | 45.22 |
|                          |                  | FCN [9]                             | ***38.95              | 7.62       | <0.001 | 23.84    | 54.05 |
|                          |                  | Deeplabv3+ [10] with MobileNet [11] | **20.7                | 7.62       | 0.008  | 5.59     | 35.8  |
| Dice coefficient         | Proposed D-FCN2s | Deeplabv3+ [10] with Xception [12]  | ***44.95              | 7.62       | <0.001 | 29.84    | 60.05 |
|                          |                  | Deeplabv3+ [10] with ResNet [13]    | ***30.53              | 7.62       | <0.001 | 15.43    | 45.64 |
|                          |                  | Proposed DSL-FCN2s                  | 3.6                   | 6.96       | 0.606  | -10.18   | 17.39 |
|                          |                  | Proposed SL-FCN [1]                 | 1.17                  | 7.09       | 0.869  | -12.88   | 15.21 |
|                          |                  | Modified FCN [2-6]                  | 1.98                  | 7.09       | 0.78   | -12.06   | 16.03 |
|                          |                  | U-Net [7]                           | ***29.98              | 7.09       | <0.001 | 15.94    | 44.03 |
|                          |                  | SegNet [8]                          | ***40.15              | 7.09       | <0.001 | 26.1     | 54.19 |
|                          |                  | FCN [9]                             | ***41.31              | 7.09       | <0.001 | 27.27    | 55.36 |
| IoU                      | Proposed D-FCN2s | Deeplabv3+ [10] with MobileNet [11] | **22.31               | 7.09       | 0.002  | 8.27     | 36.36 |
|                          |                  | Deeplabv3+ [10] with Xception [12]  | ***38.4               | 7.09       | <0.001 | 24.35    | 52.44 |
|                          |                  | Deeplabv3+ [10] with ResNet [13]    | **24.23               | 7.09       | 0.001  | 10.19    | 38.28 |
|                          |                  | Proposed DSL-FCN2s                  | 5.78                  | 7.48       | 0.441  | -9.05    | 20.61 |
|                          |                  | Proposed SL-FCN [1]                 | 2.24                  | 7.62       | 0.77   | -12.87   | 17.35 |
|                          |                  | Modified FCN [2-6]                  | 3.22                  | 7.62       | 0.674  | -11.89   | 18.33 |
|                          |                  | U-Net [7]                           | ***30.8               | 7.62       | <0.001 | 15.69    | 45.91 |
|                          |                  | SegNet [8]                          | ***40.13              | 7.62       | <0.001 | 25.02    | 55.24 |
|                          |                  | FCN [9]                             | ***41.8               | 7.62       | <0.001 | 26.69    | 56.91 |
|                          |                  | Deeplabv3+ [10] with MobileNet [11] | ***27.72              | 7.62       | <0.001 | 12.61    | 42.83 |
|                          |                  | Deeplabv3+ [10] with Xception [12]  | ***43.72              | 7.62       | <0.001 | 28.61    | 58.83 |
|                          |                  | Deeplabv3+ [10] with ResNet [13]    | ***29.38              | 7.62       | <0.001 | 14.27    | 44.49 |

The mean difference is significant at the level of \*0.05, \*\*0.01 and \*\*\*0.001.

**Table S2.** Multiple comparisons for segmentation of HER2 amplification on FISH breast dataset : LSD test.

| LSD Multiple Comparison |                    |                                    |                      |            |        |         |       |  |
|-------------------------|--------------------|------------------------------------|----------------------|------------|--------|---------|-------|--|
| Measurement             | (I) Method         | (J) Method                         | Mean Difference(I-J) | Std. Error | Sig.   | 95%C.I. |       |  |
| Accuracy                | Proposed DSL-FCN2s | SL-FCN [1]                         | 1.92                 | 1.15       | 0.095  | -0.34   | 4.17  |  |
|                         |                    | Modified FCN [2-6]                 | 2.08                 | 1.15       | 0.07   | -0.17   | 4.33  |  |
|                         |                    | DeepLabv3+ [10]with Mobilenet [11] | ***10.29             | 1.15       | <0.001 | 8.04    | 12.54 |  |
|                         |                    | DeepLabv3+ [10]with ResNet [13]    | ***10.4              | 1.15       | <0.001 | 8.14    | 12.65 |  |
|                         |                    | DeepLabv3+ [10]with Xception [12]  | ***18.62             | 1.15       | <0.001 | 16.37   | 20.88 |  |
|                         |                    | CPN [14]                           | ***17.79             | 1.15       | <0.001 | 15.54   | 20.04 |  |
|                         |                    | SOLOv2 [15]                        | ***7.35              | 1.15       | <0.001 | 5.1     | 9.6   |  |
|                         |                    | BCNet [16]                         | ***9.47              | 1.15       | <0.001 | 7.22    | 11.73 |  |
| Precision               | Proposed DSL-FCN2s | SL-FCN [1]                         | -2.46                | 1.82       | 0.177  | -6.02   | 1.11  |  |
|                         |                    | Modified FCN [2-6]                 | -2.61                | 1.82       | 0.152  | -6.17   | 0.96  |  |
|                         |                    | DeepLabv3+ [10]with Mobilenet [11] | ***13.77             | 1.82       | <0.001 | 10.2    | 17.34 |  |
|                         |                    | DeepLabv3+ [10]with ResNet [13]    | ***19.51             | 1.82       | <0.001 | 15.94   | 23.08 |  |
|                         |                    | DeepLabv3+ [10]with Xception [12]  | ***22.95             | 1.82       | <0.001 | 19.38   | 26.52 |  |
|                         |                    | CPN [14]                           | ***31.75             | 1.82       | <0.001 | 28.19   | 35.32 |  |
|                         |                    | SOLOv2 [15]                        | ***9.75              | 1.82       | <0.001 | 6.19    | 13.32 |  |
|                         |                    | BCNet [16]                         | ***6.03              | 1.82       | 0.001  | 2.46    | 9.59  |  |
| Recall                  | Proposed DSL-FCN2s | SL-FCN [1]                         | ***11.24             | 2.16       | <0.001 | 7       | 15.47 |  |
|                         |                    | Modified FCN [2-6]                 | ***12.63             | 2.16       | <0.001 | 8.4     | 16.87 |  |
|                         |                    | DeepLabv3+ [10]with Mobilenet [11] | ***29.82             | 2.16       | <0.001 | 25.59   | 34.06 |  |
|                         |                    | DeepLabv3+ [10]with ResNet [13]    | ***18.32             | 2.16       | <0.001 | 14.09   | 22.56 |  |
|                         |                    | DeepLabv3+ [10]with Xception [12]  | ***49.49             | 2.16       | <0.001 | 45.26   | 53.72 |  |
|                         |                    | CPN [14]                           | ***17.81             | 2.16       | <0.001 | 13.58   | 22.04 |  |
|                         |                    | SOLOv2 [15]                        | ***18.9              | 2.16       | <0.001 | 14.67   | 23.13 |  |
|                         |                    | BCNet [16]                         | ***32.4              | 2.16       | <0.001 | 28.17   | 36.63 |  |
| Dice Coefficient        | Proposed DSL-FCN2s | SL-FCN [1]                         | *4.57                | 1.78       | 0.011  | 1.07    | 8.07  |  |
|                         |                    | Modified FCN [2-6]                 | **5.14               | 1.78       | 0.004  | 1.64    | 8.64  |  |
|                         |                    | DeepLabv3+ [10]with Mobilenet [11] | ***22.18             | 1.78       | <0.001 | 18.68   | 25.68 |  |
|                         |                    | DeepLabv3+ [10]with ResNet [13]    | ***19.03             | 1.78       | <0.001 | 15.53   | 22.53 |  |
|                         |                    | DeepLabv3+ [10]with Xception [12]  | ***44                | 1.78       | <0.001 | 40.5    | 47.5  |  |
|                         |                    | CPN [14]                           | ***26.2              | 1.78       | <0.001 | 22.7    | 29.69 |  |
|                         |                    | SOLOv2 [15]                        | ***14.17             | 1.78       | <0.001 | 10.67   | 17.66 |  |
|                         |                    | BCNet [16]                         | ***21                | 1.78       | <0.001 | 17.5    | 24.5  |  |
| IoU                     | Proposed DSL-FCN2s | SL-FCN [1]                         | ***7.61              | 1.98       | <0.001 | 3.73    | 11.5  |  |
|                         |                    | Modified FCN [2-6]                 | ***8.59              | 1.97       | <0.001 | 4.72    | 12.47 |  |
|                         |                    | DeepLabv3+ [10]with Mobilenet [11] | ***32.02             | 1.97       | <0.001 | 28.15   | 35.89 |  |
|                         |                    | DeepLabv3+ [10]with ResNet [13]    | ***28.28             | 1.97       | <0.001 | 24.4    | 32.15 |  |
|                         |                    | DeepLabv3+ [10]with Xception [12]  | ***51.84             | 1.97       | <0.001 | 47.96   | 55.71 |  |
|                         |                    | CPN [14]                           | ***37.1              | 1.97       | <0.001 | 33.23   | 40.97 |  |
|                         |                    | SOLOv2 [15]                        | ***22.62             | 1.97       | <0.001 | 18.75   | 26.5  |  |
|                         |                    | BCNet [16]                         | ***30.76             | 1.97       | <0.001 | 26.89   | 34.63 |  |

The mean difference is significant at the level of \*0.05, \*\*0.01 and \*\*\*0.001.

**Table S3.** Multiple comparisons for segmentation of HER2 amplification on DISH breast dataset : LSD test.

| LSD Multiple Comparison |                    |                                         |                      |            |        |         |       |
|-------------------------|--------------------|-----------------------------------------|----------------------|------------|--------|---------|-------|
| Measurement             | (I) Method         | (J) Method                              | Mean Difference(I-J) | Std. Error | Sig.   | 95%C.I. |       |
| Accuracy                | Proposed DSL-FCN2s | SL-FCN [1]                              | 0.69                 | 1.71       | 0.686  | -2.68   | 4.06  |
|                         |                    | U-Net [7]+InceptionV4 [17]              | ***11.23             | 1.71       | <0.001 | 7.86    | 14.6  |
|                         |                    | Ensemble of U-Net variants <sup>d</sup> | ***10.51             | 1.71       | <0.001 | 7.14    | 13.88 |
|                         |                    | U-Net [7]                               | ***8.44              | 1.71       | <0.001 | 5.07    | 11.81 |
|                         |                    | SegNet [8]                              | ***9.16              | 1.71       | <0.001 | 5.79    | 12.53 |
|                         |                    | FCN [9]                                 | ***11.58             | 1.71       | <0.001 | 8.21    | 14.95 |
|                         |                    | Modified FCN [2-6]                      | ***6.28              | 1.71       | <0.001 | 2.91    | 9.65  |
|                         |                    | DeepLabv3+ [10]with Mobilenet [11]      | ***18                | 1.71       | <0.001 | 14.63   | 21.37 |
|                         |                    | DeepLabv3+ [10]with ResNet [13]         | ***14.44             | 1.71       | <0.001 | 11.07   | 17.81 |
|                         |                    | DeepLabv3+ [10]with Xception [12]       | ***16.61             | 1.71       | <0.001 | 13.24   | 19.98 |
|                         |                    | CPN [14]                                | ***11.72             | 1.71       | <0.001 | 8.35    | 15.09 |
|                         |                    | SOLOv2 [15]                             | ***10.55             | 1.71       | <0.001 | 7.18    | 13.92 |
|                         |                    | BCNet [16]                              | ***11.61             | 1.71       | <0.001 | 8.24    | 14.98 |
| Precision               | Proposed DSL-FCN2s | SL-FCN [1]                              | 4.03                 | 3.15       | 0.202  | -2.17   | 10.24 |
|                         |                    | U-Net [7]+InceptionV4 [17]              | ***17.25             | 3.15       | <0.001 | 11.05   | 23.46 |
|                         |                    | Ensemble of U-Net variants <sup>d</sup> | ***16.42             | 3.15       | <0.001 | 10.21   | 22.63 |
|                         |                    | U-Net [7]                               | ***20.41             | 3.15       | <0.001 | 14.2    | 26.62 |
|                         |                    | SegNet [8]                              | ***25.1              | 3.15       | <0.001 | 18.9    | 31.31 |
|                         |                    | FCN [9]                                 | ***18.25             | 3.15       | <0.001 | 12.05   | 24.46 |
|                         |                    | Modified FCN [2-6]                      | ***8.69              | 3.15       | <0.001 | 2.48    | 14.89 |
|                         |                    | DeepLabv3+ [10]with Mobilenet [11]      | ***35.75             | 3.15       | <0.001 | 29.55   | 41.96 |
|                         |                    | DeepLabv3+ [10]with ResNet [13]         | ***31.81             | 3.15       | <0.001 | 25.6    | 38.02 |
|                         |                    | DeepLabv3+ [10]with Xception [12]       | ***34.81             | 3.15       | <0.001 | 28.6    | 41.02 |
|                         |                    | CPN [14]                                | ***23.42             | 3.15       | <0.001 | 17.21   | 29.63 |
|                         |                    | SOLOv2 [15]                             | ***11.7              | 3.15       | <0.001 | 5.49    | 17.9  |
|                         |                    | BCNet [16]                              | ***17.2              | 3.15       | <0.001 | 10.99   | 23.4  |
| Recall                  | Proposed DSL-FCN2s | SL-FCN [1]                              | 0.06                 | 3.43       | 0.985  | -6.7    | 6.83  |
|                         |                    | U-Net [7]+InceptionV4 [17]              | ***21.29             | 3.43       | <0.001 | 14.53   | 28.05 |
|                         |                    | Ensemble of U-Net variants <sup>d</sup> | ***22.57             | 3.43       | <0.001 | 15.8    | 29.33 |
|                         |                    | U-Net [7]                               | ***14.75             | 3.43       | <0.001 | 7.99    | 21.51 |
|                         |                    | SegNet [8]                              | 4.84                 | 3.43       | 0.16   | -1.92   | 11.6  |
|                         |                    | FCN [9]                                 | ***38.14             | 3.43       | <0.001 | 31.38   | 44.9  |
|                         |                    | Modified FCN [2-6]                      | ***24.43             | 3.43       | <0.001 | 17.67   | 31.19 |
|                         |                    | DeepLabv3+ [10]with Mobilenet [11]      | ***14.34             | 3.43       | <0.001 | 7.58    | 21.11 |
|                         |                    | DeepLabv3+ [10]with ResNet [13]         | ***10.57             | 3.43       | <0.001 | 3.8     | 17.33 |
|                         |                    | DeepLabv3+ [10]with Xception [12]       | *20.23               | 3.43       | 0.02   | 13.47   | 27    |
|                         |                    | CPN [14]                                | ***16.62             | 3.43       | <0.001 | 9.86    | 23.38 |
|                         |                    | SOLOv2 [15]                             | ***31.4              | 3.43       | <0.001 | 24.64   | 38.16 |
|                         |                    | BCNet [16]                              | ***26.79             | 3.43       | <0.001 | 20.03   | 33.55 |
| Dice Coefficient        | Proposed DSL-FCN2s | SL-FCN [1]                              | 1.94                 | 2.59       | 0.454  | -3.16   | 7.04  |
|                         |                    | U-Net [7]+InceptionV4 [17]              | ***19.7              | 2.59       | <0.001 | 14.59   | 24.8  |
|                         |                    | Ensemble of U-Net variants <sup>d</sup> | ***20.2              | 2.59       | <0.001 | 15.09   | 25.3  |
|                         |                    | U-Net [7]                               | ***17.95             | 2.59       | <0.001 | 12.85   | 23.05 |
|                         |                    | SegNet [8]                              | ***16.35             | 2.59       | <0.001 | 11.24   | 21.45 |
|                         |                    | FCN [9]                                 | ***32.86             | 2.59       | <0.001 | 27.76   | 37.96 |
|                         |                    | Modified FCN [2-6]                      | ***18.78             | 2.59       | <0.001 | 13.68   | 23.89 |
|                         |                    | DeepLabv3+ [10]with Mobilenet [11]      | ***27.31             | 2.59       | <0.001 | 22.21   | 32.41 |
|                         |                    | DeepLabv3+ [10]with ResNet [13]         | ***22.92             | 2.59       | <0.001 | 17.82   | 28.02 |
|                         |                    | DeepLabv3+ [10]with Xception [12]       | ***29.2              | 2.59       | <0.001 | 24.09   | 34.3  |
|                         |                    | CPN [14]                                | ***20.75             | 2.59       | <0.001 | 15.65   | 25.85 |
|                         |                    | SOLOv2 [15]                             | ***24.86             | 2.59       | <0.001 | 19.76   | 29.96 |
|                         |                    | BCNet [16]                              | ***23.58             | 2.59       | <0.001 | 18.48   | 28.68 |
| IoU                     | Proposed DSL-FCN2s | SL-FCN [1]                              | 2.92                 | 3.06       | 0.341  | -3.11   | 8.96  |
|                         |                    | U-Net [7]+InceptionV4 [17]              | ***26.56             | 3.06       | <0.001 | 20.53   | 32.6  |
|                         |                    | Ensemble of U-Net variants <sup>d</sup> | ***25.9              | 3.06       | <0.001 | 19.87   | 31.94 |
|                         |                    | U-Net [7]                               | ***24.62             | 3.06       | <0.001 | 18.59   | 30.66 |
|                         |                    | SegNet [8]                              | ***22.6              | 3.06       | <0.001 | 16.56   | 28.64 |
|                         |                    | FCN [9]                                 | ***39.85             | 3.06       | <0.001 | 33.81   | 45.88 |
|                         |                    | Modified FCN [2-6]                      | ***24.91             | 3.06       | <0.001 | 18.88   | 30.95 |
|                         |                    | DeepLabv3+ [10]with Mobilenet [11]      | ***33.6              | 3.06       | <0.001 | 27.56   | 39.63 |
|                         |                    | DeepLabv3+ [10]with ResNet [13]         | ***29.04             | 3.06       | <0.001 | 23      | 35.08 |
|                         |                    | DeepLabv3+ [10]with Xception [12]       | ***36.93             | 3.06       | <0.001 | 30.89   | 42.97 |
|                         |                    | CPN [14]                                | ***27.27             | 3.06       | <0.001 | 21.23   | 33.31 |
|                         |                    | SOLOv2 [15]                             | ***32.26             | 3.06       | <0.001 | 26.22   | 38.3  |
|                         |                    | BCNet [16]                              | ***29.1              | 3.06       | <0.001 | 23.06   | 35.13 |

## References

1. Wang, C.W.; Lin, K.Y.; Lin, Y.J.; Khalil, M.A.; Chu, K.L.; Chao, T.K. A Soft Label Deep Learning to Assist Breast Cancer Target Therapy and Thyroid Cancer Diagnosis. *Cancers* **2022**, *14*, 5312.
2. Lin, Y.J.; Chao, T.K.; Khalil, M.A.; Lee, Y.C.; Hong, D.Z.; Wu, J.J.; Wang, C.W. Deep Learning Fast Screening Approach on Cytological Whole Slides for Thyroid Cancer Diagnosis. *Cancers* **2021**, *13*, 3891.
3. Wang, C.W.; Liou, Y.A.; Lin, Y.J.; Chang, C.C.; Chu, P.H.; Lee, Y.C.; Wang, C.H.; Chao, T.K. Artificial intelligence-assisted fast screening cervical high grade squamous intraepithelial lesion and squamous cell carcinoma diagnosis and treatment planning. *Scientific Reports* **2021**, *11*, 1–14.
4. Khalil, M.A.; Lee, Y.C.; Lien, H.C.; Jeng, Y.M.; Wang, C.W. Fast Segmentation of Metastatic Foci in H&E Whole-Slide Images for Breast Cancer Diagnosis. *Diagnostics* **2022**, *12*, 990.
5. Wang, C.W.; Lee, Y.C.; Chang, C.C.; Lin, Y.J.; Liou, Y.A.; Hsu, P.C.; Chang, C.C.; Sai, A.K.O.; Wang, C.H.; Chao, T.K. A Weakly Supervised Deep Learning Method for Guiding Ovarian Cancer Treatment and Identifying an Effective Biomarker. *Cancers* **2022**, *14*, 1651.
6. Wang, C.W.; Chang, C.C.; Lee, Y.C.; Lin, Y.J.; Lo, S.C.; Hsu, P.C.; Liou, Y.A.; Wang, C.H.; Chao, T.K. Weakly supervised deep learning for prediction of treatment effectiveness on ovarian cancer from histopathology images. *Computerized Medical Imaging and Graphics* **2022**, *99*, 102093. <https://doi.org/https://doi.org/10.1016/j.compmedimag.2022.102093>.
7. Falk, T.; Mai, D.; Bensch, R.; Çiçek, Ö.; Abdulkadir, A.; Marrakchi, Y.; Böhm, A.; Deubner, J.; Jäckel, Z.; Seiwald, K.; et al. U-Net: deep learning for cell counting, detection, and morphometry. *Nature methods* **2019**, *16*, 67–70.
8. Badrinarayanan, V.; Kendall, A.; Cipolla, R. Segnet: A deep convolutional encoder-decoder architecture for image segmentation. *IEEE transactions on pattern analysis and machine intelligence* **2017**, *39*, 2481–2495.
9. Shelhamer, E.; Long, J.; Darrell, T. Fully convolutional networks for semantic segmentation. *IEEE transactions on pattern analysis and machine intelligence* **2017**, *39*, 640–651.
10. Chen, L.C.; Zhu, Y.; Papandreou, G.; Schroff, F.; Adam, H. Encoder-decoder with atrous separable convolution for semantic image segmentation. In Proceedings of the Proceedings of the European conference on computer vision (ECCV), 2018, pp. 801–818.
11. Howard, A.G.; Zhu, M.; Chen, B.; Kalenichenko, D.; Wang, W.; Weyand, T.; Andreetto, M.; Adam, H. Mobilenets: Efficient convolutional neural networks for mobile vision applications. *arXiv preprint arXiv:1704.04861* **2017**.
12. Chollet, F. Xception: Deep learning with depthwise separable convolutions. In Proceedings of the Proceedings of the IEEE conference on computer vision and pattern recognition, 2017, pp. 1251–1258.
13. He, K.; Zhang, X.; Ren, S.; Sun, J. Deep residual learning for image recognition. In Proceedings of the Proceedings of the IEEE conference on computer vision and pattern recognition, 2016, pp. 770–778.
14. Upschulte, E.; Harmeling, S.; Amunts, K.; Dickscheid, T. Contour Proposal Networks for Biomedical Instance Segmentation. *Medical Image Analysis* **2022**, p. 102371.
15. Wang, X.; Zhang, R.; Kong, T.; Li, L.; Shen, C. Solov2: Dynamic and fast instance segmentation. *Advances in Neural information processing systems* **2020**, *33*, 17721–17732.
16. Ke, L.; Tai, Y.W.; Tang, C.K. Deep Occlusion-Aware Instance Segmentation With Overlapping BiLayers. In Proceedings of the Proceedings of the IEEE/CVF Conference on Computer Vision and Pattern Recognition (CVPR), June 2021, pp. 4019–4028.
17. Szegedy, C.; Ioffe, S.; Vanhoucke, V.; Alemi, A.A. Inception-v4, inception-resnet and the impact of residual connections on learning. In Proceedings of the Thirty-first AAAI conference on artificial intelligence, 2017.
